# Supplementary material for: Glycosylphosphatidylinositol Anchor Biosynthesis Pathway-Related Protein GPI7 Is Required for the Vegetative Growth and Pathogenicity of Colletotrichum graminicola
Source: MDPI journal article supplement (doi:10.3390/ijms23062985), 2022-03-10
Supplement: s1 [file s1]

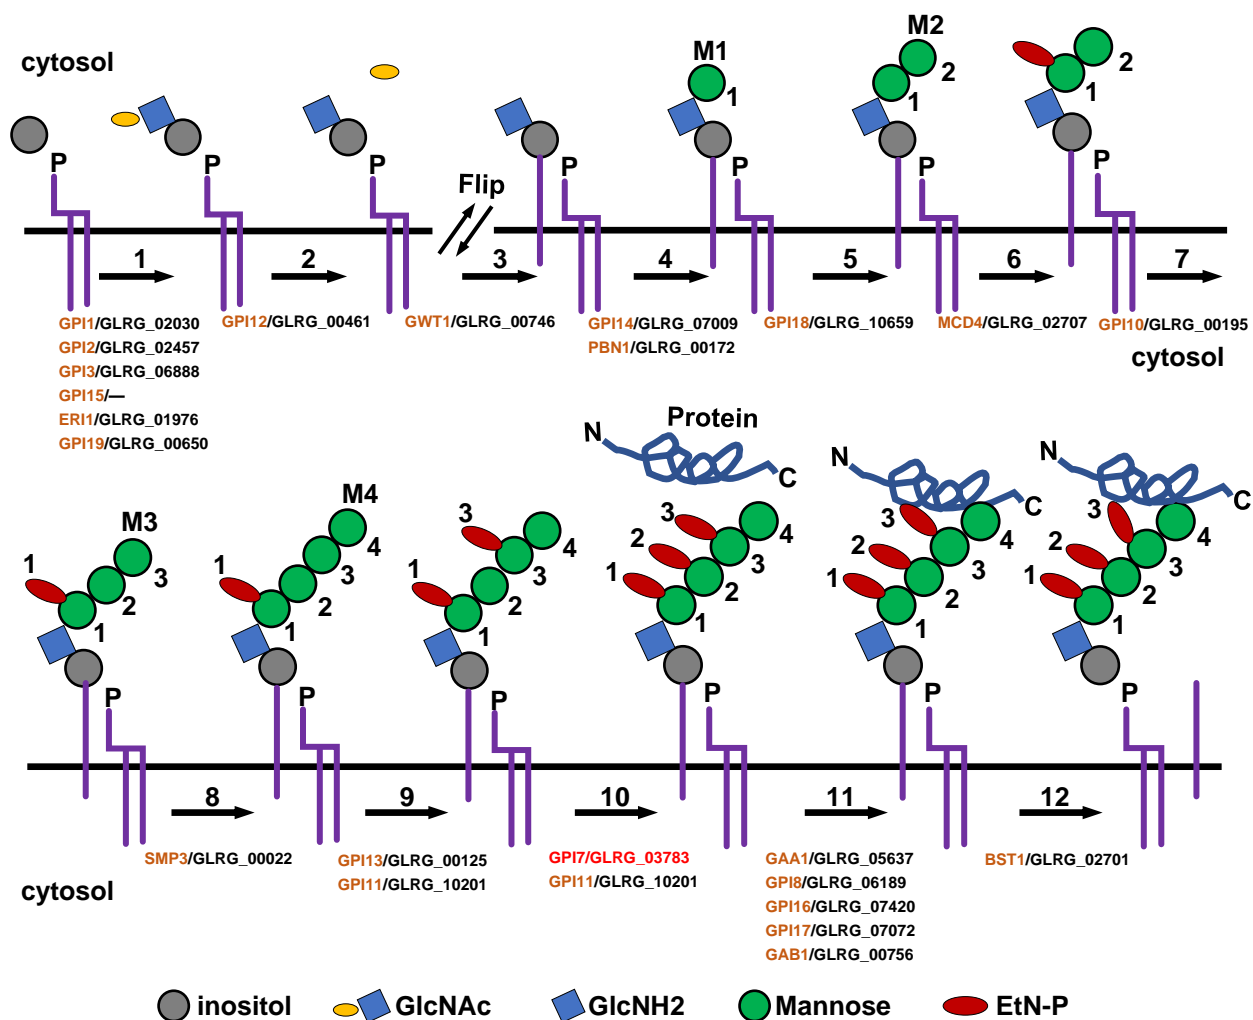

**Supplemental Figure S1: Putative GPI-anchor synthesis pathway in *C.graminicola*.** The figure was drawn by referring to *S.cerevisiae*. The GPI-anchor synthesis pathway proteins in *S.cerevisiae* and the corresponding homologous proteins found in *C.graminicola* are shown. Number 1 to 12 indicated the biosynthetic steps. GlcNH<sub>2</sub>, Glucosamine; GlcNAc, N-Acetyl-Glucosamine; Man, Mannose; EtN-P, phosphorylethanolamine; inositol-P, phosphatidylinositol.

|                                 |                                                                                                                                      |      |
|---------------------------------|--------------------------------------------------------------------------------------------------------------------------------------|------|
| MCD4_Saccharomyces_cerevisiae   | MWNKSTITLAVVVFHLLHNSIFDIYFVSFVHSGSWQSTPTP.....PARRSEILVVDGLRAGTTFCKVTHF.....VSGKTEPLAFFRSVNNNAHGSHTMPTESRPGHV                        | 109  |
| MCD4_Aspergillus_nidulans       | MARLGSTGFLTLAVVFHLLHNSIFDIYFVSFVHSGSWQSTPTP.....GSEAPARRVLDVADGLRAGTTFELTDDPLPEESNGDDLTFFAPFIRSVLSHGTGGSHTMPTESRPGHV                 | 119  |
| MCD4_Magnaporthe_oryzae         | ..MSRSGRFMAVAVVFHLLHNSIFDIYFVSFVHSGSWQSTPTP.....SKPAPARRVLDVADGLRAGTTFELTDDPLPEESNGDDLTFFAPFIRSVLSHGTGGSHTMPTESRPGHV                 | 116  |
| MCD4_Fusarium_graminearum       | MAGSSRGCFMAVAVVFHLLHNSIFDIYFVSFVHSGSWQSTPTP.....HVKPAPARRVLDVADGLRAGTTFELTDDPLPEESNGDDLTFFAPFIRSVLSHGTGGSHTMPTESRPGHV                | 119  |
| MCD4_Colletotrichum_graminicola | MAVSSAGFLAVAVVFHLLHNSIFDIYFVSFVHSGSWQSTPTP.....HVKPAPARRVLDVADGLRAGTTFELTDDPLPEESNGDDLTFFAPFIRSVLSHGTGGSHTMPTESRPGHV                 | 118  |
| Consensus                       | r          v fhl y     sifdiyf sp v gm                  pa rl l v dg lrad f      p                  lap rs v     t g sht r ptesrpghv |      |
| MCD4_Saccharomyces_cerevisiae   | AIACGYEDVSAYTCKKKNPNVNFDSFNKSHHTSSGSPDILNKHKPSSENNKTFWVVDHTDFDTGSSIEHFAVVRHLDQTHNSTLNSLDYBHTGKGNVFFLHLGLDTPRH                        | 229  |
| MCD4_Aspergillus_nidulans       | AIACGYEDVSAYTCKKKNPNVNFDSFNKSHHTSSGSPDILNKHKPSSENNKTFWVVDHTDFDTGSSIEHFAVVRHLDQTHNSTLNSLDYBHTGKGNVFFLHLGLDTPRH                        | 238  |
| MCD4_Magnaporthe_oryzae         | AIACGYEDVSAYTCKKKNPNVNFDSFNKSHHTSSGSPDILNKHKPSSENNKTFWVVDHTDFDTGSSIEHFAVVRHLDQTHNSTLNSLDYBHTGKGNVFFLHLGLDTPRH                        | 235  |
| MCD4_Fusarium_graminearum       | AIACGYEDVSAYTCKKKNPNVNFDSFNKSHHTSSGSPDILNKHKPSSENNKTFWVVDHTDFDTGSSIEHFAVVRHLDQTHNSTLNSLDYBHTGKGNVFFLHLGLDTPRH                        | 238  |
| MCD4_Colletotrichum_graminicola | AIACGYEDVSAYTCKKKNPNVNFDSFNKSHHTSSGSPDILNKHKPSSENNKTFWVVDHTDFDTGSSIEHFAVVRHLDQTHNSTLNSLDYBHTGKGNVFFLHLGLDTPRH                        | 237  |
| Consensus                       | a iag yedvsav  gwk npvnfds fn s ht s gspdil mf ga p vd y     edf     ld vf     f     l     r d     vffhlhlg dt gh                    |      |
| MCD4_Saccharomyces_cerevisiae   | RPYSAEYIDNMYVDDQIPILIDKVNKGFAADKTAFTADHGMSAGSHGDGHEINTRTPLVAGAGINNK.....VHNPFVSNYNTENMSSIKENDVQAGFASMSVLDVNVME                       | 345  |
| MCD4_Aspergillus_nidulans       | RPYSAEYIDNMYVDDQIPILIDKVNKGFAADKTAFTADHGMSAGSHGDGHEINTRTPLVAGAGINNK.....VHNPFVSNYNTENMSSIKENDVQAGFASMSVLDVNVME                       | 358  |
| MCD4_Magnaporthe_oryzae         | RPYSAEYIDNMYVDDQIPILIDKVNKGFAADKTAFTADHGMSAGSHGDGHEINTRTPLVAGAGINNK.....VHNPFVSNYNTENMSSIKENDVQAGFASMSVLDVNVME                       | 355  |
| MCD4_Fusarium_graminearum       | RPYSAEYIDNMYVDDQIPILIDKVNKGFAADKTAFTADHGMSAGSHGDGHEINTRTPLVAGAGINNK.....VHNPFVSNYNTENMSSIKENDVQAGFASMSVLDVNVME                       | 357  |
| MCD4_Colletotrichum_graminicola | RPYSAEYIDNMYVDDQIPILIDKVNKGFAADKTAFTADHGMSAGSHGDGHEINTRTPLVAGAGINNK.....VHNPFVSNYNTENMSSIKENDVQAGFASMSVLDVNVME                       | 356  |
| Consensus                       | rpys ey n k d         f d taf ftdhgms  gshgdghe ntrtp l v g g p         d     w l     r dv qad a im l g p                            |      |
| MCD4_Saccharomyces_cerevisiae   | RKQVSGFHAIDGKESFLAHVNRARSLELTLVDEEVI.DSOFVKEVFKVEK..SHSHYLEIETLQRSEGENVLEQDANTFLTESMQITSGVLYLVNVPFRTITVVE                            | 462  |
| MCD4_Aspergillus_nidulans       | TRVQGVSELEVVDGTPREDAALAAATQVLENNVKEGHHK.AALLRYRPFEPPLAS...DYGNASARQLAMKDLIDRGFY..EALHTSAPATAPATAGVLYLVNVPFRTITVVE                    | 472  |
| MCD4_Magnaporthe_oryzae         | ANVGVHPPELTAANKREAEITVYAGQGLEVYVVEKKKQSQPKYKALAGGAGNSRGIEERVAARRLIDGQNH..EALHSAPAHKVGSGVLYLVNVPFRTITVVE                              | 473  |
| MCD4_Fusarium_graminearum       | ANVGVHPPELTAANKREAEITVYAGQGLEVYVVEKKKQSQPKYKALAGGAGNSRGIEERVAARRLIDGQNH..EALHSAPAHKVGSGVLYLVNVPFRTITVVE                              | 470  |
| MCD4_Colletotrichum_graminicola | ANVGVHPPELTAANKREAEITVYAGQGLEVYVVEKKKQSQPKYKALAGGAGNSRGIEERVAARRLIDGQNH..EALHSAPAHKVGSGVLYLVNVPFRTITVVE                              | 469  |
| Consensus                       | n vg p         k a n     le y vk                                         i         ai     l     l gl yl ty w f r     t g             |      |
| MCD4_Saccharomyces_cerevisiae   | FVGHPFFSFIIFKSPFLIENVDDQKASPLSHAVGSGICLGNWILFYQGSFNFNMLLPFLYFWSYFTNSVLRGKIEFPGTSPKWRVLTITISIIIVGEG...EVVGFFHMTF                      | 578  |
| MCD4_Aspergillus_nidulans       | YVGHTAYALTIVLHVLHGASESDRTT.ASIFSESSVILVDFSVLYQGSFNRVLDGFPFLIFWEEVFARAKAFHAG.....RAG.....ALLLPKRD..                                   | 561  |
| MCD4_Magnaporthe_oryzae         | YVGHTAYALTIVLHVLHGASESDRTT.MGLAATAVILVDFASFIASGPTTPARAFPPVFWEEVYARQSLVQGRLLFAHIFKPGVLSASFVLAAYTVAVTVLAGVIRSEVL                       | 592  |
| MCD4_Fusarium_graminearum       | YVGHTAYALTIVLHVLHGASESDRTT.LGSAFTLSVLVDFSSFTISRSFPAHDAFFPVLVFWEEVYARQSLVQGRLLFAHIFKPGVLSASFVLAAYTVAVTVLAGVIRSEVL                     | 589  |
| MCD4_Colletotrichum_graminicola | YVGHTAYALTIVLHVLHGASESDRTT.LGSAFTLSVLVDFSSFTISRSFPAHDAFFPVLVFWEEVYARQSLVQGRLLFAHIFKPGVLSASFVLAAYTVAVTVLAGVIRSEVL                     | 588  |
| Consensus                       | gw                                         l         sp y y     p     w         r     g                                         r    |      |
| MCD4_Saccharomyces_cerevisiae   | TLITNLIAEYFICQVREISVN.....ILNITISVLSTFIDCAVLDLNLHSLHLILILSKAFYAKIHSRINSY.....TATPGLISIAAMLAVTRRSVISGLIQ                              | 682  |
| MCD4_Aspergillus_nidulans       | .....HNSVVDIDITPYCGAFMLLTGLLWLFDEILGTS..HOPAVSRKGSNIMGICLGMVLLILVITRSVISGLIQ                                                         | 638  |
| MCD4_Magnaporthe_oryzae         | TCGLTGLAFWASYSIGIFQHEAALAGTWFVSCLMGTFLLKCNBNDLHLICGALMVVIGLTVLSLESFVRDSSDTPFPVKRHNVSALYAGLGVILAMLVTRSVIAIRAKK                        | 712  |
| MCD4_Fusarium_graminearum       | TCGLTGLAFWASYSIGIFQHEAALAGTWFVSCLMGTFLLKCNBNDLHLICGALMVVIGLTVLSLESFVRDSSDTPFPVKRHNVSALYAGLGVILAMLVTRSVIAIRAKK                        | 709  |
| MCD4_Colletotrichum_graminicola | TCGLTGLAFWASYSIGIFQHEAALAGTWFVSCLMGTFLLKCNBNDLHLICGALMVVIGLTVLSLESFVRDSSDTPFPVKRHNVSALYAGLGVILAMLVTRSVIAIRAKK                        | 700  |
| Consensus                       | tlvylaaftwmtvlgftrhsnvlavvffaclvmvftllpamgsbvpvlvacitamaaigmalvwedkllsrp.....alpaalaltgvvlgillalilvtrssalssqakl                      |      |
| MCD4_Saccharomyces_cerevisiae   | GLRERSCVACMIIFPVFLVFMILHYRKNKNKVRDLIILTFASFSILTISSESLFVFLFSPYVMVQMEIEN.....KIKEMNKQDEN.....WL                                        | 771  |
| MCD4_Aspergillus_nidulans       | GLRERSCVACMIIFPVFLVFMILHYRKNKNKVRDLIILTFASFSILTISSESLFVFLFSPYVMVQMEIEN.....KIKEMNKQDEN.....WL                                        | 756  |
| MCD4_Magnaporthe_oryzae         | GLRERSCVACMIIFPVFLVFMILHYRKNKNKVRDLIILTFASFSILTISSESLFVFLFSPYVMVQMEIEN.....KIKEMNKQDEN.....WL                                        | 831  |
| MCD4_Fusarium_graminearum       | GLRERSCVACMIIFPVFLVFMILHYRKNKNKVRDLIILTFASFSILTISSESLFVFLFSPYVMVQMEIEN.....KIKEMNKQDEN.....WL                                        | 815  |
| MCD4_Colletotrichum_graminicola | GLRERSCVACMIIFPVFLVFMILHYRKNKNKVRDLIILTFASFSILTISSESLFVFLFSPYVMVQMEIEN.....KIKEMNKQDEN.....WL                                        | 811  |
| Consensus                       | glp q g     s     p         pn y rl     lt p     l l t i s e l f y     f     w     e                 r     q         vt     l        |      |
| MCD4_Saccharomyces_cerevisiae   | QVLNVSILCFEIQCAFFTCGNWASGSFSLSVSGILHFGHLMGALMLMLIFSGHSTCHLNLHNFKYDTTSSLTISMSSILSGFYLTPEGSWLIGSTISNVCIHLS                             | 891  |
| MCD4_Aspergillus_nidulans       | SDARVALFFELQCAFFTCGNWASGSFSLSVSGILHFGHLMGALMLMLIFSGHSTCHLNLHNFKYDTTSSLTISMSSILSGFYLTPEGSWLIGSTISNVCIHLS                              | 876  |
| MCD4_Magnaporthe_oryzae         | TDARVALFFELQCAFFTCGNWASGSFSLSVSGILHFGHLMGALMLMLIFSGHSTCHLNLHNFKYDTTSSLTISMSSILSGFYLTPEGSWLIGSTISNVCIHLS                              | 951  |
| MCD4_Fusarium_graminearum       | SDARVALFFELQCAFFTCGNWASGSFSLSVSGILHFGHLMGALMLMLIFSGHSTCHLNLHNFKYDTTSSLTISMSSILSGFYLTPEGSWLIGSTISNVCIHLS                              | 935  |
| MCD4_Colletotrichum_graminicola | ADARVALFFELQCAFFTCGNWASGSFSLSVSGILHFGHLMGALMLMLIFSGHSTCHLNLHNFKYDTTSSLTISMSSILSGFYLTPEGSWLIGSTISNVCIHLS                              | 931  |
| Consensus                       | r         llq aff tgn as s fs l sv r p f p     g ll lk     p     s     g l l         sd l ff     egswl ig ti     a                   |      |
| MCD4_Saccharomyces_cerevisiae   | SLERMLILEVLGHVLLKNVITQDKTKKTQ.....                                                                                                   | 919  |
| MCD4_Aspergillus_nidulans       | CTFVAGLEFLSEVFISVDVFLGRLTDAITAS..VDFIVNGIISKQGDVNPVGVEDK                                                                             | 929  |
| MCD4_Magnaporthe_oryzae         | CVFVALLGVSTLFAVGKVSSEGRSGGRRD..ADAKVAPTRSNQKTATKALDG.                                                                                | 1003 |
| MCD4_Fusarium_graminearum       | CVFVALLGVSTLFAVGKVSSEGRSGGRRD..AALTSASPKDEPVPVAGAE.                                                                                  | 981  |
| MCD4_Colletotrichum_graminicola | CVFVALLGVSTLFAVGKVSSEGRSGGRRD..TANGCTPLTATKA.                                                                                        | 985  |
| Consensus                       | f     le                                                                                                                             |      |

**Supplemental Figure S2: Multiple alignment of MCD4 from different fungi species.** Homologous proteins of MCD4 from 5 different fungi species and performed multiple alignment. Total sequence identity is 67.09%.

|                                 |                                                                                                                              |     |
|---------------------------------|------------------------------------------------------------------------------------------------------------------------------|-----|
| GPI7_Saccharomyces_cerevisiae   | .....MNLKQFTCLSCAQLLALLIFAFRRFRIVITTSKQDPQDR..DLQRDRFQQLVFVITDALRSDFLSDQISHFNN.....VHGLWNTFSAAGHSFANPPTVAFPRR                | 105 |
| GPI7_Aspergillus nidulans       | .....MVHHLVLVANVLFIAVIVSLGFFFRFSLICSHATFSFED....RFRVRGAVIVFVVVLAASDVIVNNSGFLTQSPIDFRSRLRSRFRFRAHSGSVVAFRA                    | 108 |
| GPI7_Magnaporthe oryzae         | MQPNEELRLATVLLIANVIFLAFITKGFRRFSLKSVKVOVLGLSPFDFADRLICQAVVVDALASDVIVSSESGFFFTQ.....SLIRNRNLSRFRFRAHSGSVVAFRA                 | 114 |
| GPI7_Fusarium graminearum       | MVPSHNSLRLTLLIANLIPASIVVFNLCFFRFFRFLFAEFSLDF..GSPFNAPDRLLFVVQALRSDEVVYSDSGSEYVQ.....SLIRNRNLSRFRFRAHSGSVVAFRA                | 112 |
| GPI7_Colletotrichum graminicola | .MSFRYGGFGLATLLIVANILFLAIVTERTFFFRFVFLVGLHAKYETLDY..GPPRAAPDRLLFVVQDALF.....RLIRNRNLSRFRFRAHSGSVVAFRA                        | 96  |
| Consensus                       | ..... f ffp k g f f dalr ..... g a t a ptvt pr k                                                                             |     |
| GPI7_Saccharomyces_cerevisiae   | STTGSFSGFDMILVAQDIDNDSEHSMGLFIQHNN..TRFVGDDTWLKLFPQWGFAPFHSFFSDFTVNNVNTNIPGRUFQEWAMDVAILHYLGLDGHIGHRGSPRSKF                  | 224 |
| GPI7_Aspergillus nidulans       | AMTGSFSGFDMILNARSSTSTSLAYOCQWLRKAKGE.QQVVMGDDTWLKLFPQWMSRSRSGTTSFFVSDFTVNNVNRHHDDELVTG..LWSGMILHYLGLDGHIGHRGSPRSY            | 224 |
| GPI7_Magnaporthe oryzae         | AITGSFSGFDMILNINCEDESSGASOCQWLRKAKAKATGKLVGGDDTWLKLFPD.TDRACGCSFFVADFTVNNVNRHITPLENN..LWNTLVHYLGLDGHIGHRGSPRSY               | 231 |
| GPI7_Fusarium graminearum       | SMTGSFSGFDMILNIDGCDTSSDASOCQWLRKAKHAKGKLLVGGDDTWLKLFPN.TDRSGGTSFFVADFTVNNVNRNIAPLENN..LWGLMVHYLGLDGHIGHRGSPSN                | 229 |
| GPI7_Colletotrichum graminicola | AITGSFSGFDMILNIDGADTSSDASOCQWLRKAKAGELAMVGGDDTWLKLFPD.TDRSGGTSFFVADFTVNNVNRHITPLEND..LWSTLVHYLGLDGHIGHRGSPSSH                | 213 |
| Consensus                       | ttgs psf d ln s l d wl q gddtwklfp f d t sffv dft vd nvtr l w hylgldhighk gp s                                               |     |
| GPI7_Saccharomyces_cerevisiae   | MAAPGCMGSLIKSYIDVLEHEDDDDTLICVSDRCMNLNHNHSGSAGETSAGLSSFRACQARFESQVNYTLPINASPDWNQFVLETGGLDVFPTAALHSAFPMSSVGLHIG               | 344 |
| GPI7_Aspergillus nidulans       | AVPSGCMGSLIAQVVRAMEQEAELGSTIFILGCDRMRMDNHCSSAGETSAGLSSFRACQSLGAG.....RESFVNATHELOQTVVGLDVFPTAALHSAFPMSSVGLHIG                | 337 |
| GPI7_Magnaporthe oryzae         | MLPSGCMGSLIVETISATESQALGSTVLVVGCDHGRADNHCSSAGETSAGLSSFRACQALONG.....VPMMPVEDEQTVVGLDVFPTAALHSAFPMSSVGLHIG                    | 344 |
| GPI7_Fusarium graminearum       | MLPSGCMGSLIVETLEAMKTFPHLSTLVLVLCGDHGNADNHCSSAGETSAGLSSFRACQPKDESDYVGLDVFPTAALHSAFPMSSVGLHIG                                  | 342 |
| GPI7_Colletotrichum graminicola | MYPSGCMGSLIKRIVSAMOTQSHMSSALLVLGCDHGNADNHCSSAGETSAGLSSFRACQALORN.....LSAPAAFKDESDYVGLDVFPTAALHSAFPMSSVGLHIG                  | 326 |
| Consensus                       | m k emd gdhgm gnhg ss gets l f spk v q d pt l g p n g i                                                                      |     |
| GPI7_Saccharomyces cerevisiae   | GFQLLR...NKLASKKFMELKLS.DHRGEVALGDFTA.....EDYITKMYTIOETL.....TKSATNYYPLLLAFVGL...FLIITITAILVGLR.YS.PDFWQ                     | 435 |
| GPI7_Aspergillus nidulans       | BFNMMHLGSRIRLLACNKKQLNALKEITYPHNFGDDTLF.ASCYDSDPRGPDGALANAAQAGELHQYGADAAADDIVQVTEIESALLRFRSSQEVMSAASNMRLYLLICITAG            | 456 |
| GPI7_Magnaporthe oryzae         | GFPPFWRSRRDKTOLLNNAKQIGIVEATYCGDKLTSSLF..DEICVHGKSAMGVLACENKKILETAG...DEVTSDFRDAEVPVPTVAVLEAAGQIMSSMASNMOKKLKQSMV            | 459 |
| GPI7_Fusarium graminearum       | GFPPFWKTSQIQIIVNNARQIINIVTAATGSELDFSKSS..VDPCALEQTEINELACENKINKEA...HVLAAGDNLGQSLDEMSONLRRAGDLMSSMASNMOKKLIYQQAIAA           | 456 |
| GPI7_Colletotrichum graminicola | GFPPFWDRNDQVOLIRNARQIRKVVVATGPEMGTATTSAREACAGPDQDAQELACENHRVNDAL...KNMDGQAGELPINLEAMSKVLSKAGDLMSSMASNMOKKLHICAVAI            | 452 |
| Consensus                       | fl n sss eee w w t wn gqk w                                                                                                  |     |
| GPI7_Saccharomyces cerevisiae   | LTVS.....SLSVLVSIIIGVSTFASFPFEESSGSHDGNVITAFSAVP.LFVVLNVLIIVR....WFIMMACVSNHNNNSORFIYS.VVMSNLLNQNSWNRKCL                     | 532 |
| GPI7_Aspergillus nidulans       | LAVLFSFIVTIVKALSHNFRFLFTTGVLGLGDMRASSV..EEECQFVWGTGFTPIGHVRSIRLQAPQAGATYLLPAAILAISHFRRNRNQTGQAPAEPOIARIYLPSSRINMALL          | 576 |
| GPI7_Magnaporthe oryzae         | CRIGTLGVPVLLGD.EPRFVPLGSLIRGLKSNMSSVIVV...EFTFAMLAIVIGPRRLVFGSARLAGEIIVSVGLMALLNNQTCOKPAGCPDITWILFKPSFTILLFCL                | 578 |
| GPI7_Fusarium graminearum       | IAAVASAMVVVSLGAHRRQILPFPALLTLAAGAMVASSVVEECQFVWGTGFTPIGHVRSIRLQAPQAGATYLLPAAILAISHFRRNRNQTGQAPAEPOIARIYLPSSRINMALL           | 573 |
| GPI7_Colletotrichum graminicola | LATG....SLVFG..ARLSLPLILAIAVAVGVMMPSAVVEEHRHNNVTTSAWLGILAKHMQTTRPIKT..LLSLLLALTATPISNNQTCOKPAGCPDITWILFKPSFTILLFCL           | 553 |
| Consensus                       | ..... sss eee w w t wn gqk w                                                                                                 |     |
| GPI7_Saccharomyces cerevisiae   | NMLTFLVIMAS.AGFOVLFHIVTITVLVGLCFTYKISLIVNGQAEIPFMHDLAKIDFAPTESNIVLARVFGQAWIVVRSIRLVLTCLKVLKNKNYLIKDMKVITILLMFQTSSQN          | 651 |
| GPI7_Aspergillus nidulans       | IVVTYADVCLHMDNIS...SLIWRLLCLAVTAMCFTFLVFAESPELNLNETTIOVTATFMDGITTVLYARVAMGGIATVLMFLIMRNGKLP.....IKGQLFREALTLFLLTQSR          | 686 |
| GPI7_Magnaporthe oryzae         | ILVTVFVYVRELLRGESCLPTIPNTIGTTTIVLAALSFLKAFITYEESPEIVFG.FAOTLLKFTAGASINBARAVFGGLAVGATVIFSMVTKLP..RSNKATGSATLHLHFLFAMTQSR      | 696 |
| GPI7_Fusarium graminearum       | ITLGMMLSFRLARLKSLPSLASTSITSVLLMSAYSPKLDFTSEDAPELVVG.FAKSLNDLLVQCSINBARATFLLLSLLFGYGIYRSFTGG..LRNMWQGSAYLFFHLYTIFGMTQSR       | 690 |
| GPI7_Colletotrichum graminicola | VSLTFLFLVQILRLGLFRALAVATSATLALSFTFKVAFNEDAPELVVG.VPATLNALIQSLSVTRATVFAGVATAAYSTYLTLSNP..RVEARHTSPILLHLITLLATQSR              | 670 |
| Consensus                       | ..... l ar                                                                                                                   |     |
| GPI7_Saccharomyces cerevisiae   | ICQFVFLQILESQIFYFQVIFPTASTSTSKIYFSNLVDEILNFRFSGGGGNSGSHDGNVITAFSAVP.LFVVLNVLIIVR....WFIMMACVSNHNNNSORFIYS.VVMSNLLNQNSWNRKCL  | 766 |
| GPI7_Aspergillus nidulans       | VTVVFILFPRF....LQKALTWNNNSAE...VTLSLGLAIAHFGGSAAGSDGNVITAFSAVP.LFVVLNVLIIVR....WFIMMACVSNHNNNSORFIYS.VVMSNLLNQNSWNRKCL       | 787 |
| GPI7_Magnaporthe oryzae         | ATNIPVLELLD....VIFKVTSSQPTREE.....LSTITLLAPFAPFGCGGNSGSHDGNVITAFSAVP.LFVVLNVLIIVR....WFIMMACVSNHNNNSORFIYS.VVMSNLLNQNSWNRKCL | 801 |
| GPI7_Fusarium graminearum       | ATNIPVLELLD....VIFKVTSSQPTREE.....LSTITLLAPFAPFGCGGNSGSHDGNVITAFSAVP.LFVVLNVLIIVR....WFIMMACVSNHNNNSORFIYS.VVMSNLLNQNSWNRKCL | 795 |
| GPI7_Colletotrichum graminicola | VTVNPLLLFT....FQLPFTASLLSLPA....LSTTSLGLAIAHFGGSAAGSDGNVITAFSAVP.LFVVLNVLIIVR....WFIMMACVSNHNNNSORFIYS.VVMSNLLNQNSWNRKCL     | 781 |
| Consensus                       | ..... l q ff fgg n is dl ay g vg l n a w                                                                                     |     |
| GPI7_Saccharomyces cerevisiae   | SKLPAPTVOICFGTCILDAVVRHBLFMSVFSRKLDCFLGNFVMGLN...GWLPEALCAL                                                                  | 829 |
| GPI7_Aspergillus nidulans       | HTALLTPHASICLTSVMAACTALHBLFMSVFSRKLDCFLGNFVMGLN...GWLPEALCAL                                                                 | 847 |
| GPI7_Magnaporthe oryzae         | HVTVLMTFASVGAHMACTVHBLFMSVFSRKLDCFLGNFVMGLN...GWLPEALCAL                                                                     | 866 |
| GPI7_Fusarium graminearum       | VYALQTLFVSATVALVMACTVHBLFMSVFSRKLDCFLGNFVMGLN...GWLPEALCAL                                                                   | 860 |
| GPI7_Colletotrichum graminicola | HVGHMLTFTACSVAFTHVAGEAIRHBLFMSVFSRKLDCFLGNFVMGLN...GWLPEALCAL                                                                | 846 |
| Consensus                       | ..... m ac r hlf v v fspk y w l                                                                                              |     |

**Supplemental Figure S3: Multiple alignment of GPI7 from different fungi species.** Homologous proteins of GPI7 from 5 different fungi species and performed multiple alignment. Total sequence identity is 57.15%.

|                                  |                                                                                                                        |      |
|----------------------------------|------------------------------------------------------------------------------------------------------------------------|------|
| GPI13_Saccharomyces_cerevisiae   | .....MDEKTIKSISSNDKIIYKS.....RIKKFKNKHFYIILLVITAILQFIHAF                                                               | 53   |
| GPI13_Magnaporthe_oryzae         | MPSSPKTPAATGGKTPOTHTAASKTSFATQDYKATAAQFAAKKLKEADAKAKARAEAPTEQIEAKSRINALQKEQAKLRDALEGRSSRARFESRWTTVFWFWVIFTHAAGILVE     | 120  |
| GPI13_Colletotrichum_graminicola | .....MPQOKAS.RAKAPPP.P.ADYKATAEQYAKAKRKQEMEEASRLPEEQAEKERAMLE.....KQRAVFESRRKDAYERRWWTVGFWAMMCLHAGVCAF                 | 94   |
| GPI13_Fusarium_graminearum       | .....MAKPKAKPKAQOQTPO.TEHQKIAEQWAKARARAAQOTANARFLGPPADENVEVLE.....QRREALDQRKRSNKRNRWAAGFWVVLAIHALCML                   | 96   |
| GPI13_Aspergillus_nidulans       | .....MSSRNSSTDAFNRK.G.....LLNSSECESDPPPTQAKMLSHMQSRTAIKSLKD.....DHVEKLER.EFKYKHLSSLGVFVITILLVVEHFE                     | 87   |
| Consensus                        | .....i f                                                                                                               |      |
| GPI13_Saccharomyces_cerevisiae   | RFPLSRLVLDNIS.....SQNETSKLIPPRARVILVLDALRGSRAEVNESHSHNYLNMYHNILSYDSFISDKDASSLAFPIADPPPTQRLK                            | 148  |
| GPI13_Magnaporthe_oryzae         | SGPLSLGSLLESSELAFFIAVLPMNGLIGIKDWKRGTFDGGCWHEHNSRVAIVLDIAIUSOFVW.....VDDQAEIHNAAFHMRKTEKFNNAFSEPIADPPPTQRLK            | 234  |
| GPI13_Colletotrichum_graminicola | SGPLSLGSLLESSELAFFIAVLPMNGLIGIKDWKRGTFDGGCWHEHNSRVAIVLDIAIUSOFVW.....VDDQAEIHNAAFHMRKTEKFNNAFSEPIADPPPTQRLK            | 200  |
| GPI13_Fusarium_graminearum       | SGPLSLGSLLESSELAFFIAVLPMNGLIGIKDWKRGTFDGGCWHEHNSRVAIVLDIAIUSOFVW.....VDDQAEIHNAAFHMRKTEKFNNAFSEPIADPPPTQRLK            | 201  |
| GPI13_Aspergillus_nidulans       | SGPLSLGSLLESSELAFFIAVLPMNGLIGIKDWKRGTFDGGCWHEHNSRVAIVLDIAIUSOFVW.....VDDQAEIHNAAFHMRKTEKFNNAFSEPIADPPPTQRLK            | 198  |
| Consensus                        | t gfil r vl s p f a idalr df p a i fiadppt t qrlkg                                                                     |      |
| GPI13_Saccharomyces_cerevisiae   | LTGGLPTFFLAGNSRQCTV.BEDNLSKQILHNKTVKFGDGTWMLHPHFLS.NDSFFLSNVNVDLITVNGVMDYFHDHQQDK..LENDVMIGHYLCQDGHGNYGPGHFTREKQ       | 265  |
| GPI13_Magnaporthe_oryzae         | LTGGLPTFFLAGNSRQCTV.BEDNLSKQILHNKTVKFGDGTWMLHPHFLS.NDSFFLSNVNVDLITVNGVMDYFHDHQQDK..LENDVMIGHYLCQDGHGNYGPGHFTREKQ       | 354  |
| GPI13_Colletotrichum_graminicola | LTGGLPTFFLAGNSRQCTV.BEDNLSKQILHNKTVKFGDGTWMLHPHFLS.NDSFFLSNVNVDLITVNGVMDYFHDHQQDK..LENDVMIGHYLCQDGHGNYGPGHFTREKQ       | 320  |
| GPI13_Fusarium_graminearum       | LTGGLPTFFLAGNSRQCTV.BEDNLSKQILHNKTVKFGDGTWMLHPHFLS.NDSFFLSNVNVDLITVNGVMDYFHDHQQDK..LENDVMIGHYLCQDGHGNYGPGHFTREKQ       | 321  |
| GPI13_Aspergillus_nidulans       | LTGGLPTFFLAGNSRQCTV.BEDNLSKQILHNKTVKFGDGTWMLHPHFLS.NDSFFLSNVNVDLITVNGVMDYFHDHQQDK..LENDVMIGHYLCQDGHGNYGPGHFTREKQ       | 318  |
| Consensus                        | lttg lptf d gs f g i edn ql gddtw lf s nvwdl tvd gv wd gh lg dh gh yyp h m k                                           |      |
| GPI13_Saccharomyces_cerevisiae   | QAGSGLDNLKSGIDDTLLVYGDHGMDSKCHGCSQDGYEARLWMYSSRRPFG..RTNPFYSAPATKAPSTNIDIVLITALLIPIDNNLPGCTPEFAFGKGDAGGDAIAA           | 383  |
| GPI13_Magnaporthe_oryzae         | QAGSGLDNLKSGIDDTLLVYGDHGMDSKCHGCSQDGYEARLWMYSSRRPFG..RTNPFYSAPATKAPSTNIDIVLITALLIPIDNNLPGCTPEFAFGKGDAGGDAIAA           | 472  |
| GPI13_Colletotrichum_graminicola | QAGSGLDNLKSGIDDTLLVYGDHGMDSKCHGCSQDGYEARLWMYSSRRPFG..RTNPFYSAPATKAPSTNIDIVLITALLIPIDNNLPGCTPEFAFGKGDAGGDAIAA           | 438  |
| GPI13_Fusarium_graminearum       | QAGSGLDNLKSGIDDTLLVYGDHGMDSKCHGCSQDGYEARLWMYSSRRPFG..RTNPFYSAPATKAPSTNIDIVLITALLIPIDNNLPGCTPEFAFGKGDAGGDAIAA           | 439  |
| GPI13_Aspergillus_nidulans       | QAGSGLDNLKSGIDDTLLVYGDHGMDSKCHGCSQDGYEARLWMYSSRRPFG..RTNPFYSAPATKAPSTNIDIVLITALLIPIDNNLPGCTPEFAFGKGDAGGDAIAA           | 436  |
| Consensus                        | q d i idd tllv gdhgmd g hgg s de l ys r v qddiv l ll g pip nllg pi e                                                   |      |
| GPI13_Saccharomyces_cerevisiae   | ...RISQQLKQKDTMQIHENDEILEPLAKNISNTPTSPDEKFKVLG.....HKYKVEQCTQBLWAFEDFYYSIATGILLATSLVILISITKLIPSIYVN.....               | 478  |
| GPI13_Magnaporthe_oryzae         | SRVAAGLRKRSSSVFAARCTAAGSGPGT..PAEVWSSAAIAIATAGAKKO..KLQHAYSLFAQYCAETALICGLWAFEDFYSIMLILGNMALGLMALILYARDSDDTAGSPAVEMDD  | 588  |
| GPI13_Colletotrichum_graminicola | SRVTAAGLRKRSSSVFAARCTAAGSGPGT..PAEVWSSAAIAIATAGAKKO..KLQHAYSLFAQYCAETALICGLWAFEDFYSIMLILGNMALGLMALILYARDSDDTAGSPAVEMDD | 549  |
| GPI13_Fusarium_graminearum       | SRVTAAGLRKRSSSVFAARCTAAGSGPGT..PAEVWSSAAIAIATAGAKKO..KLQHAYSLFAQYCAETALICGLWAFEDFYSIMLILGNMALGLMALILYARDSDDTAGSPAVEMDD | 546  |
| GPI13_Aspergillus_nidulans       | LNSSQKPKKQQAARNSSESGNSGS...MEYNETARQWQAHGHRPNPKFSVSNINAYKQYRRTIQAARLWAFEDFYSIMLILGNMALGLMALILYARDSDDTAGSPAVEMDD        | 542  |
| Consensus                        | .....y g q l c lwa fd gi l f s n s t                                                                                   |      |
| GPI13_Saccharomyces_cerevisiae   | .....QMPVEIPGIIIMVLVNLCPHFIFY..VYQPSFVDQFQWFTLLATGIIITCYITIPRYNNIWIAMALGETIADYSRVIAWMTIHALLENSEK                       | 576  |
| GPI13_Magnaporthe_oryzae         | LDIAEKKELEIAVNRKQDVSRHLERKLVQSALVSLGPAALG..VAAQTLMWLGSKTTIGITIDTSIIAVLAALVGVGRKFTALB...SSVAGSLSVTVVVSQSGPSSNSK         | 702  |
| GPI13_Colletotrichum_graminicola | LDIAEKKELEIQGVQ..ADAATSYKTLHKVILITAILGAVPGAAVG..AGYSIFTCPQDLYVALAGAAVSAVGVLFVSYGFC.KTFRNMLP...NTFGKHLAVTVVSQSGPSSNSK   | 660  |
| GPI13_Fusarium_graminearum       | LDIAEKKELELSFK..ENDPEIEDNFKNKALGMDPKILFTVSV..LTAVGMYRQPIEGVLVALVVLFMAGLSSELHEAG.KTILNVFP...SFGGMMAVTVTVVSQSGPSSNSK     | 657  |
| GPI13_Aspergillus_nidulans       | .....RTLLTGPLSRVGLGSILGALVGTLMAILGLTEIKVLELSALLAAGSICGASVAIFGSS.QRLSLPLP...NSLGLMLAILTVVSQSGPSSNSK                     | 635  |
| Consensus                        | .....a w f s n s t                                                                                                     |      |
| GPI13_Saccharomyces_cerevisiae   | IWEBSLWELSLSTGMLTYEFVFLPKRQSTALLTATISEKEGTTSGVNPSTANSNYLPTFRAPLILSGVSHAVLIITFIDHSMITICREGEYVCHIFNN...QNNSSMMWGLCFL     | 693  |
| GPI13_Magnaporthe_oryzae         | IWEBSLWELSLSTGMLTYEFVFLPKRQSTALLTATISEKEGTTSGVNPSTANSNYLPTFRAPLILSGVSHAVLIITFIDHSMITICREGEYVCHIFNN...QNNSSMMWGLCFL     | 787  |
| GPI13_Colletotrichum_graminicola | IWEBSLWELSLSTGMLTYEFVFLPKRQSTALLTATISEKEGTTSGVNPSTANSNYLPTFRAPLILSGVSHAVLIITFIDHSMITICREGEYVCHIFNN...QNNSSMMWGLCFL     | 745  |
| GPI13_Fusarium_graminearum       | IWEBSLWELSLSTGMLTYEFVFLPKRQSTALLTATISEKEGTTSGVNPSTANSNYLPTFRAPLILSGVSHAVLIITFIDHSMITICREGEYVCHIFNN...QNNSSMMWGLCFL     | 742  |
| GPI13_Aspergillus_nidulans       | IWEBSLWELSLSTGMLTYEFVFLPKRQSTALLTATISEKEGTTSGVNPSTANSNYLPTFRAPLILSGVSHAVLIITFIDHSMITICREGEYVCHIFNN...QNNSSMMWGLCFL     | 720  |
| Consensus                        | iwed i f tfg r l yh f ras creeq c t s w l                                                                              |      |
| GPI13_Saccharomyces_cerevisiae   | MEFTHACTGCVYNNLSQYQAAHFNHNVFLRQICLNFVHSSTLSNNSAVIA..IPFLRDITIFKFTLRRIAGFSLSNVNVHMLWPLCKINIHNT.....DVKSH                | 797  |
| GPI13_Magnaporthe_oryzae         | VLAHSTVTKAMYPPTREGLAPRAGLVLRIITFLCSPKALDAYDNSGNPTISAPLEGLKLSLSVLAQVILAIQVILAFVAFYVAPPLVSLITTPF.....NPGRA               | 895  |
| GPI13_Colletotrichum_graminicola | VLAHSTVTKAMYPPTREGLAPRAGLVLRIITFLCSPKALDAYDNSGNPTISAPLEGLKLSLSVLAQVILAIQVILAFVAFYVAPPLVSLITTPF.....NPGRA               | 848  |
| GPI13_Fusarium_graminearum       | VLAHSTVTKAMYPPTREGLAPRAGLVLRIITFLCSPKALDAYDNSGNPTISAPLEGLKLSLSVLAQVILAIQVILAFVAFYVAPPLVSLITTPF.....NPGRA               | 846  |
| GPI13_Aspergillus_nidulans       | VLAHSTVTKAMYPPTREGLAPRAGLVLRIITFLCSPKALDAYDNSGNPTISAPLEGLKLSLSVLAQVILAIQVILAFVAFYVAPPLVSLITTPF.....NPGRA               | 836  |
| Consensus                        | lp s a wi l w a a                                                                                                      |      |
| GPI13_Saccharomyces_cerevisiae   | EATILGNTIYSEFFLIVNVLISILFNKPAQLSYFIMCNLLSLEITILKLR..ENIIGIHALCLLSYOHFFGTGHCATIPSWMDIGISEKVEITFEETATILNLNHPGHIL         | 915  |
| GPI13_Magnaporthe_oryzae         | QIVDVGQNAHARYLIDPMLISALIIITFVFGGALAIMMCMLSLABIIMNITPATSPIGETAILLASFFHFTGHCQALSSQWDAASVPLFSIRYRSPSLVALNLNHPASHFL        | 1015 |
| GPI13_Colletotrichum_graminicola | QIVDVGQNAHARYLIDPMLISALIIITFVFGGALAIMMCMLSLABIIMNITPATSPIGETAILLASFFHFTGHCQALSSQWDAASVPLFSIRYRSPSLVALNLNHPASHFL        | 966  |
| GPI13_Fusarium_graminearum       | QIVDVGQNAHARYLIDPMLISALIIITFVFGGALAIMMCMLSLABIIMNITPATSPIGETAILLASFFHFTGHCQALSSQWDAASVPLFSIRYRSPSLVALNLNHPASHFL        | 964  |
| GPI13_Aspergillus_nidulans       | QIVDVGQNAHARYLIDPMLISALIIITFVFGGALAIMMCMLSLABIIMNITPATSPIGETAILLASFFHFTGHCQALSSQWDAASVPLFSIRYRSPSLVALNLNHPASHFL        | 956  |
| Consensus                        | t g n g i n kp q e d lgp l f tqhg s qw f p in f                                                                        |      |
| GPI13_Saccharomyces_cerevisiae   | VSLVHLITLWQOPDVILKPQTLGR.....IVSCSGILLTYNTLCSFPIVTHRRHLMWKHICRRFIFASLSITVQLVTFGFIASFASGRLIKIHIDFHK                     | 1017 |
| GPI13_Magnaporthe_oryzae         | AAAGLGLLLWKVNPFRKGLLGLVSA.....RVLAVEVVYFAVQSAAMAHARRHLMYRVESPRFMAAAVLLVDLAVIFVSLFGFRSNTLAISEVEGVA                      | 1115 |
| GPI13_Colletotrichum_graminicola | AAAGLGLLLWKVNPFRKGLLGLVSA.....RVLAVEVVYFAVQSAAMAHARRHLMYRVESPRFMAAAVLLVDLAVIFVSLFGFRSNTLAISEVEGVA                      | 1065 |
| GPI13_Fusarium_graminearum       | AAAGLGLLLWKVNPFRKGLLGLVSA.....RVLAVEVVYFAVQSAAMAHARRHLMYRVESPRFMAAAVLLVDLAVIFVSLFGFRSNTLAISEVEGVA                      | 1063 |
| GPI13_Aspergillus_nidulans       | AAAGLGLLLWKVNPFRKGLLGLVSA.....RVLAVEVVYFAVQSAAMAHARRHLMYRVESPRFMAAAVLLVDLAVIFVSLFGFRSNTLAISEVEGVA                      | 1067 |
| Consensus                        | l lw 1 w rrlhm f prf l w                                                                                               |      |

**Supplemental Figure S4: Multiple alignment of GPI13 from different fungi species.** Homologous proteins of GPI13 from 5 different fungi species and performed multiple alignment. Total sequence identity is 55.08%.

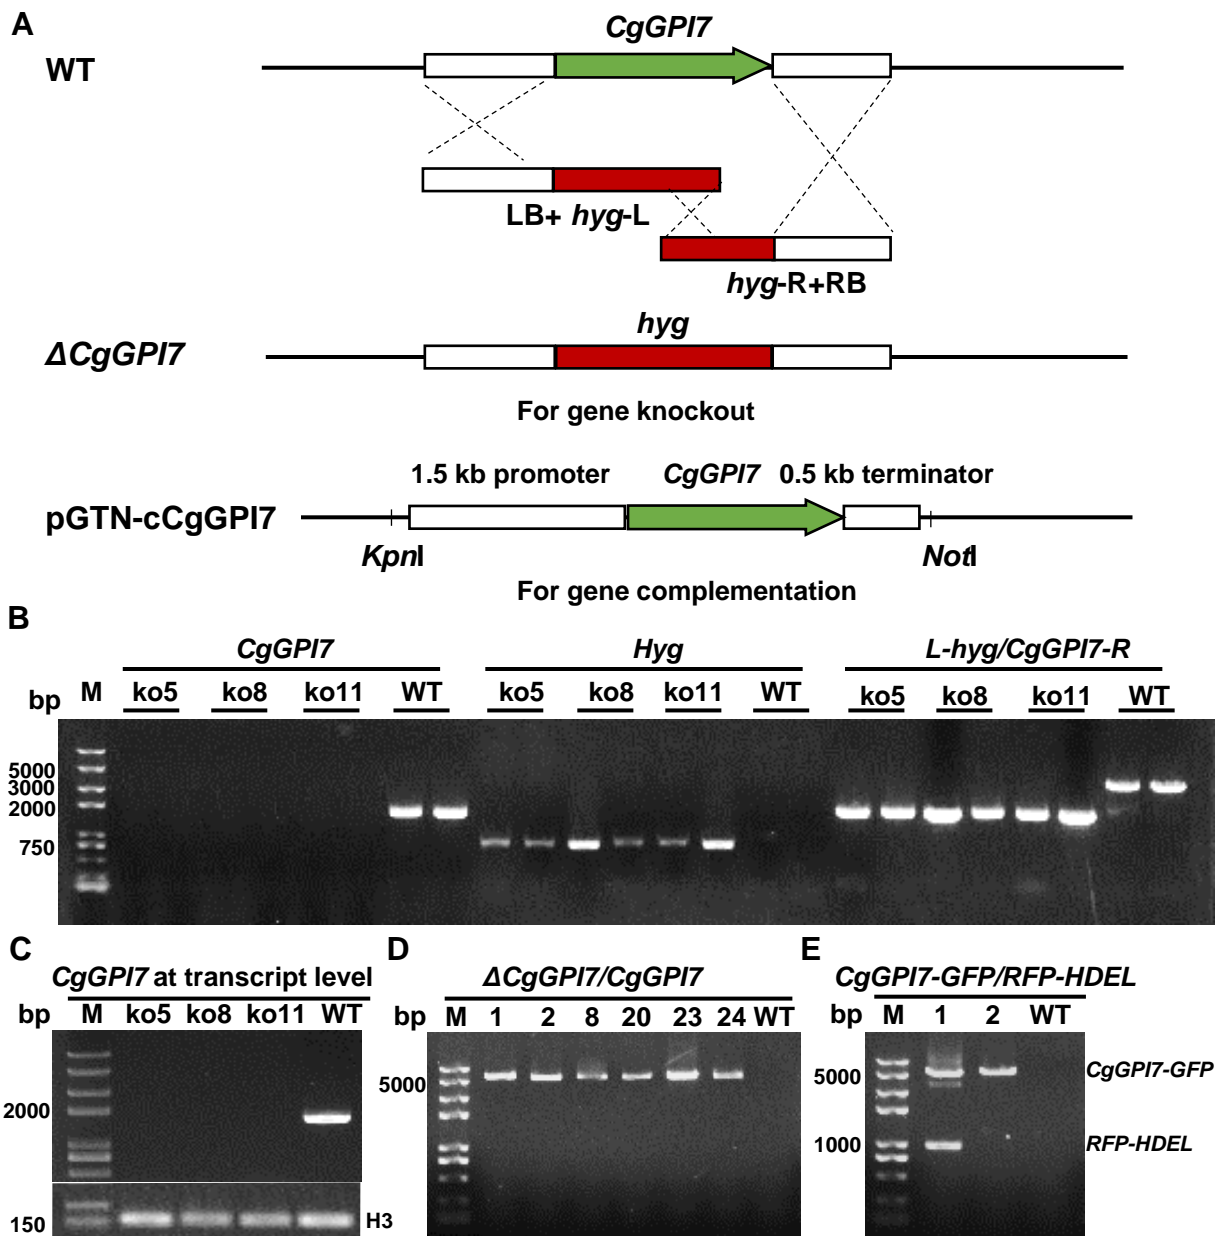

**Supplemental Figure S5: Gene knockout and complementation of *CgGPI7* in *C.graminicolla*.** (A) The *CgGPI7* gene knockout and complementation schematics. Gene knockout through a split-marker approach. And gene complementation by native promoter. (B) Verification of three *CgGPI7* knockout mutants by PCR. *CgGPI7* gene fragments couldn't be amplified in  $\Delta CgGPI7$  mutants. Hygromycin resistance gene fragments could be amplified in  $\Delta CgGPI7$  mutants. In situ amplification shown the smaller bands were amplified in  $\Delta CgGPI7$  mutants which contain the replaced *hyg* fragments.(C) Verification of *CgGPI7* knockout mutants at the transcriptional level. (D) Verification of *CgGPI7* gene complementation strains by PCR. The fusion fragments contain native promoter, ORF and terminator of *CgGPI7* were amplified in complementation strains using the vector primer. (E) Verification of *CgGPI7*-GFP and RFP-HDEL co-transformant strains by PCR. There are two bands including *RFP-HDEL* and *CgGPI7*-GFP can be amplified in correct strain by same vector primer.
