# Supplementary material for: Glycosylphosphatidylinositol Anchor Biosynthesis Pathway-Related Protein GPI7 Is Required for the Vegetative Growth and Pathogenicity of Colletotrichum graminicola
Source: MDPI journal article supplement (doi:10.3390/ijms23062985), 2022-03-10
Supplement: s1 [file s1]

**Supplemental Table S1. Primers used in this study**

| Primer name                                                                    | Sequence (5'-3')                               |
|--------------------------------------------------------------------------------|------------------------------------------------|
| <b>Knockout mutant strains construction primers</b>                            |                                                |
| Hyg-F                                                                          | CTTGGCTGGAGCTAGTGGAGGT                         |
| Hyg-R                                                                          | CCCGGTCGGCATCTACTCTATTC                        |
| HY-F                                                                           | CGTTGCAAGACCTGCCTGAA                           |
| YG-R                                                                           | GGATGCCTCCGCTCGAAGTA                           |
| MCD4-LF1                                                                       | GCGAAAGTGGCAGCATTGACTA                         |
| MCD4-LR1                                                                       | ACCTCCACTAGCTCCAGCCAAGAATGGTACTGTCCTCGGCTCTCG  |
| MCD4-LF2                                                                       | GTATCTTGGTGGCTCGGCTCA                          |
| MCD4-RF1                                                                       | GAATAGAGTAGATGCCGACCGGGGCTCGTGGTTAGAGATTGGCTCC |
| MCD4-RR1                                                                       | TGAATGGGTTGGTCAAGGTGC                          |
| MCD4-RR2                                                                       | GGTGGGTGCCGAGAATGATAA                          |
| GPI13-LF1                                                                      | CCATTGTTGGAGAGGGCTACGAT                        |
| GPI13-LR1                                                                      | ACCTCCACTAGCTCCAGCCAAGGGGTGATGTGGGCAGGAAGTAA   |
| GPI13-LF2                                                                      | ATAGCCGTCGCTTTCCAGTGG                          |
| GPI13-RF1                                                                      | GAATAGAGTAGATGCCGACCGGGCGATGGCTGTCAGTGAGGTCTTT |
| GPI13-RR1                                                                      | CCTACGAAGAACAACGGCATAACG                       |
| GPI13-RR2                                                                      | GGATTGAAGGAGGTGATGAAGGC                        |
| GPI7-LF1                                                                       | AAATGGGAGGAGACCACACAGC                         |
| GPI7-LR1                                                                       | ACCTCCACTAGCTCCAGCCAAGGGGTTTCAACGACTGGAAGAGG   |
| GPI7-LF2                                                                       | TCTCGCACAGTCACTTTCACCC                         |
| GPI7-RF1                                                                       | GAATAGAGTAGATGCCGACCGGG                        |
| GPI7-RR1                                                                       | GATTGAAGGCGAAGAGGACGAA                         |
| GPI7-RR2                                                                       | CGAGCAAAGGCTGTCAAGGAG                          |
| <b>Knockout mutant strain checking primers</b>                                 |                                                |
| MCD4-F                                                                         | CCAGTCCTTTCCAGAACCCTACC                        |
| MCD4-R                                                                         | ACAAGTGAATGACGCCGAGC                           |
| GPI13-F                                                                        | TCATTGACGCTCTGCGATACG                          |
| GPI13-R                                                                        | CGAGTGACTGGCTAACCGTGAA                         |
| GPI7-F                                                                         | GAATCTTGATGAAGCCGACACG                         |
| GPI7-R                                                                         | TGAGCCACTGCGGGATGTTA                           |
| GPI7-L-F                                                                       | TCATTCCCCCTTCAACGTGC                           |
| GPI7-R-R                                                                       | GGATCATGGGACAAGGGAGC                           |
| hyg-f                                                                          | CAGCTTCGATGTAGGAGGGC                           |
| hyg-r                                                                          | CGAAATTGCCGTCAACCAAG                           |
| <b>Complementary and subcellular localization strains construction primers</b> |                                                |

|                                                                            |                                              |
|----------------------------------------------------------------------------|----------------------------------------------|
| C-GPI7-F                                                                   | AGGGAACAAAAGCTGGGTACCTCTCGCACAGTCACTTTCACCC  |
| C-GPI7-R                                                                   | AGTAACGTTAAGTGCGGCCGCCAGGCTGATCTCCGACACAAC   |
| Sub-GPI7-R                                                                 | CATTCTAGAACTAGTGGATCCCGCAGATCCCAGTCGGTACAAGA |
| <b>Complementary and subcellular localization strains checking primers</b> |                                              |
| pGTN-cx-F                                                                  | CATTAGGCACCCCAGGCTTT                         |
| pGTN-cx-R                                                                  | TCGTGACCA CCCTGACCTAC                        |
| <b>qRT-PCR primers</b>                                                     |                                              |
| GPI7-qPCR-F                                                                | TCTGCGGAGACCACGGTATG                         |
| GPI7-qPCR-R                                                                | GTCCTCTTTGAACGCAGCAGG                        |
| GLRG_02726-F                                                               | CGTTGGTTCTTGGGTTTCCTC                        |
| GLRG_02726-R                                                               | CGTGGTGATGATGGCGAGTA                         |
| GLRG_03399-F                                                               | GCGGCAGCGAGGAGTTTAT                          |
| GLRG_03399-R                                                               | CAGCAGCACCTTGTCTTCGTT                        |
| GLRG_04171-F                                                               | GGTTCTTCCAGGCATTCGG                          |
| GLRG_04171-R                                                               | TGGGTTGAGGAGGTGCTTTC                         |
| GLRG_05787-F                                                               | TGGTTGGCAGAAGATTGTGGT                        |
| GLRG_05787-R                                                               | TGAGGTCAGAGTCAAGGGACAC                       |
| GLRG_08319-F                                                               | GCGTTCAGCCGACTTCAGT                          |
| GLRG_08319-R                                                               | AATCTCCATCCAGCACCGTT                         |
| GLRG_04217-F                                                               | AGCCGAAACCACCTTGACC                          |
| GLRG_04217-R                                                               | CATCGTCGCTACCGCAGTT                          |
| GLRG_05084-F                                                               | GCCGACATTGCTGAACTGC                          |
| GLRG_05084-R                                                               | GGTGAAGAAGATAGGCACGGG                        |
| GLRG_05478-F                                                               | AGGCGGAAGCGATGAAGA                           |
| GLRG_05478-R                                                               | TCCCTGAACCTCCCAGTTAGAG                       |
| GLRG_06327-F                                                               | CCCATTCCCGTCGGTTACT                          |
| GLRG_06327-R                                                               | TTGAAGTCAGAGTCGCCGC                          |
| GLRG_07610-F                                                               | TGCGTGCTTGTCCTAATCC                          |
| GLRG_07610-R                                                               | TGTGCTTGCGGTCGTGTT                           |
| CgH3-F                                                                     | TCAAGAAGCCTCACCGCTACAA                       |
| CgH3-R                                                                     | GAAGTCCTGGGCAATCTCACG                        |
| ZmActin-F                                                                  | GATTCTGGGATTGCCGAT                           |
| ZmActin-R                                                                  | TCTGCTGCTGAAAAGTGCTGAG                       |

**Supplemental Table S2. The genes involved in this study**

| <i>Colletotrichum graminicola</i> | <i>Saccharomyces cerevisiae</i> | Annotation of putative protein                                         |
|-----------------------------------|---------------------------------|------------------------------------------------------------------------|
| <i>GLRG_02030</i>                 | <i>GPI1</i>                     | Phosphatidylinositol N-acetylglucosaminyltransferase subunit           |
| <i>GLRG_02457</i>                 | <i>GPI2</i>                     | Phosphatidylinositol N-acetylglucosaminyltransferase subunit           |
| <i>GLRG_06888</i>                 | <i>GPI3</i>                     | Phosphatidylinositol N-acetylglucosaminyltransferase subunit           |
| —                                 | <i>GPI15</i>                    | Phosphatidylinositol N-acetylglucosaminyltransferase subunit           |
| <i>GLRG_01976</i>                 | <i>ERI1</i>                     | Phosphatidylinositol N-acetylglucosaminyltransferase subunit           |
| <i>GLRG_00650</i>                 | <i>GPI19</i>                    | Phosphatidylinositol N-acetylglucosaminyltransferase subunit           |
| <i>GLRG_00461</i>                 | <i>GPI12</i>                    | N-acetylglucosaminyl-phosphatidylinositol de-N-acetylase               |
| <i>GLRG_00746</i>                 | <i>GWT1</i>                     | GPI-anchored wall transfer protein                                     |
| <i>GLRG_07009</i>                 | <i>GPI14</i>                    | GPI mannosyltransferase                                                |
| <i>GLRG_00172</i>                 | <i>PBN1</i>                     | Protein PBN1 that probably acts by stabilizing the mannosyltransferase |
| <i>GLRG_10659</i>                 | <i>GPI18</i>                    | GPI mannosyltransferase 2                                              |
| <i>GLRG_02707</i>                 | <i>MCD4</i>                     | GPI ethanolamine phosphate transferase 1                               |
| <i>GLRG_00195</i>                 | <i>GPI10</i>                    | GPI mannosyltransferase 3                                              |
| <i>GLRG_00022</i>                 | <i>SMP3</i>                     | GPI mannosyltransferase 4                                              |
| <i>GLRG_00125</i>                 | <i>GPI13</i>                    | GPI ethanolamine phosphate transferase 3                               |
| <i>GLRG_10201</i>                 | <i>GPI11</i>                    | Glycosylphosphatidylinositol anchor biosynthesis protein 11            |
| <i>GLRG_03783</i>                 | <i>GPI7/LAS21</i>               | ethanolamine phosphate transferase 2                                   |
| <i>GLRG_05637</i>                 | <i>GAA1</i>                     | GPI transamidase component                                             |
| <i>GLRG_06189</i>                 | <i>GPI8</i>                     | GPI-anchor transamidase                                                |
| <i>GLRG_07420</i>                 | <i>GPI16</i>                    | GPI transamidase component                                             |
| <i>GLRG_07072</i>                 | <i>GPI17</i>                    | GPI transamidase component                                             |
| <i>GLRG_00756</i>                 | <i>GAB1</i>                     | GPI transamidase component                                             |
| <i>GLRG_02701</i>                 | <i>BST1</i>                     | GPI inositol-deacylase                                                 |
| <i>GLRG_04171</i>                 | <i>CHS1</i>                     | Chitin synthase I                                                      |
| <i>GLRG_03399</i>                 | <i>CHS2</i>                     | Chitin synthase II                                                     |
| <i>GLRG_05787</i>                 | <i>CHS2</i>                     | Chitin synthase II                                                     |
| <i>GLRG_02726</i>                 | <i>CHS3</i>                     | Chitin synthase III                                                    |
| <i>GLRG_08319</i>                 | <i>CHS3</i>                     | Chitin synthase III                                                    |
| <i>GLRG_05478</i>                 | <i>GAS1</i>                     | 1,3-beta-glucanosyltransferase                                         |

|                   |             |                                |
|-------------------|-------------|--------------------------------|
| <i>GLRG_05084</i> | <i>GAS2</i> | 1,3-beta-glucanosyltransferase |
| <i>GLRG_06327</i> | <i>GAS3</i> | 1,3-beta-glucanosyltransferase |
| <i>GLRG_07610</i> | <i>GAS4</i> | 1,3-beta-glucanosyltransferase |
| <i>GLRG_04217</i> | <i>GAS5</i> | 1,3-beta-glucanosyltransferase |
